# Supplementary material
Source: HighWire-hosted journal article supplement (http://bmjopenquality.bmj.com/highwire/filestream/143886/field_highwire_adjunct_files/0/bmjoq-2021-001787supp001_data_supplement.pdf)
Supplement: bmjoq-2021-001787supp001_data_supplement.pdf [file bmjoq-2021-001787supp001_data_supplement.pdf]

## Supplementary File

*Measuring Tuberculosis patient perceived quality of care in public and public- private mix settings in India- An instrument development and pilot validation study.*

**Table 1 Patient categories for qualitative interviews**

| Patient categories for In-depth interview                                                                                                               | No's |
|---------------------------------------------------------------------------------------------------------------------------------------------------------|------|
| Patients who initiated and continuing TB treatment in the Public health care facilities of NTEP Chennai                                                 | 18   |
| Patients who initiated and continuing TB treatment in the Public-Private Mix (PPM) health care facilities of Chennai                                    | 18   |
| Patients who initiated treatment at Public health care facilities of NTEP Chennai to Public-Private Mix (PPM) health care facilities in Chennai         | 18   |
| Patients who initiated treatment at Public-Private Mix (PPM) facilities in Chennai and further shifted to Public health care facilities of NTEP Chennai | 18   |

**Table 2 Content validation Table (<sup>1</sup>)**

| Relevancy                                  | Clarity                                 |
|--------------------------------------------|-----------------------------------------|
| 1- Not relevant                            | 1 -No clarity                           |
| 2- Item needs some revision                | 2- Item needs some revision             |
| 3 -Item relevant but require some revision | 3- Item clear but require some revision |
| 4 -High relevance                          | 4 –Item clear                           |

**Table 3: Content Validity Index and Content Validity Ratio of the items**

| Items | Content Validity Index (CVI) |         | Content Validity Ratio (CVR) | Included /Not included |
|-------|------------------------------|---------|------------------------------|------------------------|
|       | Relevance                    | Clarity |                              |                        |
| Q1    | 1                            | 0.9     | 1                            | Included               |
| Q2    | 0.9                          | 0.7     | 1                            | Included               |
| Q3    | 1                            | 0.5     | 0.8                          | Included               |
| Q4    | 1                            | 0.9     | 0.8                          | Included               |
| Q5    | 0.9                          | 0.9     | 1                            | Included               |
| Q6    | 0.8                          | 0.7     | 0.8                          | Included               |
| Q7    | 0.9                          | 0.9     | 1                            | Included               |
| Q8    | 0.9                          | 0.9     | 1                            | Included               |
| Q9    | 0.8                          | 0.9     | 0.8                          | Included               |
| Q10   | 1                            | 1       | 1                            | Included               |
| Q11   | 1                            | 1       | 0.8                          | Included               |
| Q12   | 1                            | 1       | 1                            | Included               |
| Q13   | 0.9                          | 1       | 0.8                          | Included               |
| Q14   | 1                            | 1       | 1                            | Included               |
| Q15   | 0.9                          | 0.9     | 0.8                          | Included               |
| Q16   | 0.7                          | 0.8     | 0.4                          | Not included           |
| Q17   | 0.7                          | 0.6     | 0.6                          | Not included           |
| Q18   | 0.8                          | 0.7     | 0.6                          | Not included           |
| Q19   | 0.8                          | 0.8     | 0.8                          | Included               |
| Q20   | 1                            | 0.9     | 0.8                          | Included               |
| Q21   | 0.5                          | 0.5     | 0.8                          | Included               |
| Q22   | 0.8                          | 0.8     | 0.8                          | Included               |
| Q23   | 1                            | 1       | 0.8                          | Included               |
| Q24   | 1                            | 1       | 1                            | Included               |
| Q25   | 1                            | 1       | 1                            | Included               |
| Q26   | 0.7                          | 0.8     | 0.4                          | Not included           |
| Q27   | 0.8                          | 0.7     | 0.8                          | Included               |
| Q28   | 0.6                          | 0.8     | 0.6                          | Not included           |
| Q29   | 0.8                          | 0.8     | 0.4                          | Not included           |
| Q30   | 0.9                          | 0.9     | 0.8                          | Included               |
| Q31   | 0.9                          | 0.9     | 0.6                          | Not included           |
| Q32   | 0.6                          | 0.5     | 0                            | Not included           |

**Table 4: Finalized domains and 32 items based on qualitative findings, content validation and cognitive interviews**

|                                                                                            |                                                                                                                                                             |
|--------------------------------------------------------------------------------------------|-------------------------------------------------------------------------------------------------------------------------------------------------------------|
| <b>Domain 1: TB Care Services</b>                                                          |                                                                                                                                                             |
| The following questions pertained to the satisfaction level with the TB care services      |                                                                                                                                                             |
| Item 1 (Q1)                                                                                | How satisfied are you with the TB <b>diagnostic services</b> ? (Example: Sputum test, X-ray, other tests)                                                   |
| Item 2(Q2)                                                                                 | How satisfied are you with the TB <b>treatment services</b> ? (Example: TB drugs, doctor consultation, referral services)                                   |
| Item 3(Q3)                                                                                 | How satisfied are you with the <b>Follow-up</b> services? (Example: reminding you about your next visit to the centre for collecting drug and sputum test). |
| Item 4(Q4)                                                                                 | How satisfied are you with the <b>working hours</b> of this centre?                                                                                         |
| Item 5(Q5)                                                                                 | How satisfied are you with the <b>distance</b> of this centre?                                                                                              |
| Item 6(Q6)                                                                                 | How satisfied are you with the <b>waiting time</b> spent? (to receive TB drugs, to consult the doctor)                                                      |
| Item 7(Q7)                                                                                 | How satisfied are you with <b>contact screening</b> services?                                                                                               |
| <b>Domain 2: Attitude of the Health Care Provider</b>                                      |                                                                                                                                                             |
| The following questions indicated the patients' experiences with the health care provider. |                                                                                                                                                             |
| Item 1(Q8)                                                                                 | How often are you satisfied with the way the health care provider <b>treats</b> you?                                                                        |
| Item 2(Q9)                                                                                 | How often does the health visitor respond <b>to your queries</b> ?                                                                                          |
| Item 3(Q10)                                                                                | How often does the health visitor <b>explain to you the importance</b> of treatment?                                                                        |
| Item 4(Q11)                                                                                | How often do you feel <b>discriminated</b> by the care provider because you're affected by TB?                                                              |
| Item 5(Q12)                                                                                | How often does the <b>doctor</b> spend sufficient <b>time</b> with you?                                                                                     |
| Item 6(Q13)                                                                                | How often the <b>health visitor</b> does spent sufficient <b>time</b> with you?                                                                             |
| Item 7(Q14)                                                                                | How often do you feel that the care provider is rude to you?                                                                                                |
| <b>Domain 3: Information given to the patient</b>                                          |                                                                                                                                                             |
| The following questions referred to the medical information provided to patients.          |                                                                                                                                                             |

|                                                                               |                                                                                                                                                                                                                           |
|-------------------------------------------------------------------------------|---------------------------------------------------------------------------------------------------------------------------------------------------------------------------------------------------------------------------|
| Item 1(Q15)                                                                   | How satisfied are you with the information given by the <b>doctor</b> on TB care services? (Example: cause, spread, prevention)                                                                                           |
| Item 2(Q16)                                                                   | How satisfied are you with the information given by the <b>doctor</b> on TB care services? (Example: drug regimen, duration of treatment, curability, side effects)                                                       |
| Item 3(Q17)                                                                   | How satisfied are you with the information given to you by the <b>Health provider</b> ? (Example: cause, spread, prevention)                                                                                              |
| Item 4(Q18)                                                                   | How satisfied are you with the information given to you by the <b>Health provider</b> ? (Example: drug regimen, duration of treatment, curability, side effects)                                                          |
| Item 5(Q19)                                                                   | How satisfied are you with the information given to you about the <b>consequences of irregular treatment</b> by the Health Provider? (Example: that discontinuation of TB drugs would sometimes lead to drug resistance). |
| <b>Domain 4: Basic amenities in the center</b>                                |                                                                                                                                                                                                                           |
| The following questions indicated basic amenities in the health facility.     |                                                                                                                                                                                                                           |
| Item 1(Q20)                                                                   | How would you rate the <b>seating facility</b> in this centre?                                                                                                                                                            |
| Item 2(Q21)                                                                   | How would you rate the quality of <b>drinking water</b> available in this centre?                                                                                                                                         |
| Item 3(Q22)                                                                   | How would you rate the <b>cleanliness</b> of this centre?                                                                                                                                                                 |
| Item 4(Q23)                                                                   | How would you rate the <b>toilet</b> facility available in this centre?                                                                                                                                                   |
| Item 5(Q24)                                                                   | How would you rate the <b>injection room</b> in this centre?                                                                                                                                                              |
| <b>Domain 5: Affordability</b>                                                |                                                                                                                                                                                                                           |
| The following questions represented the expenditure incurred on TB treatment. |                                                                                                                                                                                                                           |
| Item 1(Q25)                                                                   | How often have you spent money on <b>doctor consultation</b> ?                                                                                                                                                            |
| Item 2(Q26)                                                                   | How often have you spent money <b>on TB diagnostic</b> tests?                                                                                                                                                             |
| Item 3(Q27)                                                                   | How often have you spent money <b>on the purchase of TB drugs</b> ?                                                                                                                                                       |
| Item 4(Q28)                                                                   | How often did you spend money to <b>travel</b> to a health facility?                                                                                                                                                      |
| Item 5(Q29)                                                                   | How often was the <b>incentive</b> provided by the programme helpful?                                                                                                                                                     |
| Item 6(Q30)                                                                   | How often you have to pay <b>bribes</b> for availing TB care services in this centre?                                                                                                                                     |
| Item 7(31)                                                                    | How often did the <b>financial costs prevent</b> you from going to the health facility?                                                                                                                                   |
| <b>Domain 6 Overall rating</b>                                                |                                                                                                                                                                                                                           |
| Item 32                                                                       | Overall satisfaction with the facility                                                                                                                                                                                    |

**Table 5: Demographic profile of the respondents (TB patients) of the pilot validation**

|                                            | <b>N = 714 (%)</b> |
|--------------------------------------------|--------------------|
| <b>Type of facility</b>                    |                    |
| Public                                     | 489 (68.5)         |
| Public-Private Mix (PPM)                   | 225 (31.5)         |
| Mean Age and Standard Deviation (in years) | 44.3 ± 14.5        |
| <b>Age Range (in years)</b>                | 18 – 91            |
| <b>Gender</b>                              |                    |
| Male                                       | 481 (67.4)         |
| Female                                     | 233 (32.6)         |
| <b>Disease classification</b>              |                    |
| Pulmonary                                  | 555 (77.7)         |
| Extra-pulmonary                            | 159 (22.3)         |
| <b>Type of treatment</b>                   |                    |
| Category I                                 | 539 (75.5)         |
| Category II                                | 140 (19.6)         |
| MDR                                        | 27 (3.8)           |
| XDR                                        | 8 (1.1)            |
| <b>Type of patients</b>                    |                    |
| New                                        | 541 (75.8)         |
| Treatment after default                    | 53 (7.4)           |
| Relapse                                    | 120 (16.8)         |

**Table 6: Rotated component matrix of the factors obtained**

| Variable | Factor1 | Factor2 | Factor3 | Factor4        | Factor5 | Factor6 | Factor7 | Factor8 |
|----------|---------|---------|---------|----------------|---------|---------|---------|---------|
| q1       | 0.1903  | 0.0389  | 0.0211  | <b>0.5697*</b> | -0.1382 | -0.195  | 0.0576  | 0.0192  |
| q2       | 0.0556  | 0.1808  | 0.1602  | <b>0.6363*</b> | 0.0368  | -0.0988 | 0.1167  | 0.0809  |
| q3       | 0.0204  | 0.1045  | 0.3062  | <b>0.436*</b>  | 0.0232  | -0.1389 | 0.052   | 0.1044  |

|     |                |                |                |         |                |                |                |                |
|-----|----------------|----------------|----------------|---------|----------------|----------------|----------------|----------------|
| q4  | -0.0177        | 0.113          | 0.0869         | 0.316   | -0.0372        | -0.2064        | 0.3478         | 0.037          |
| q5  | -0.0217        | -0.0028        | 0.0186         | 0.0701  | -0.0095        | -0.0645        | <b>0.6361*</b> | -0.1091        |
| q6  | -0.0258        | 0.1303         | 0.095          | 0.2651  | 0.079          | -0.0609        | 0.3697         | 0.0206         |
| q7  | 0.1958         | 0.0478         | 0.0822         | 0.1022  | -0.1036        | 0.0217         | 0.029          | 0.0038         |
| q8  | 0.0781         | 0.1709         | <b>0.5976*</b> | 0.2504  | -0.0015        | -0.1465        | 0.0756         | -0.055         |
| q9  | -0.0034        | 0.086          | <b>0.6814*</b> | 0.0639  | 0.0552         | 0.0626         | 0.0174         | -0.1109        |
| q10 | -0.0612        | 0.176          | <b>0.4962*</b> | 0.0478  | 0.0566         | -0.0242        | -0.0135        | 0.1357         |
| q11 | 0.0031         | -0.1038        | -0.2293        | 0.0059  | -0.0513        | 0.2396         | -0.1695        | -0.0322        |
| q12 | <b>0.5559*</b> | 0.0077         | 0.1751         | 0.0344  | 0.1681         | -0.03          | -0.0702        | 0.1503         |
| q13 | 0.0273         | 0.1069         | <b>0.5356*</b> | 0.0272  | 0.0422         | -0.1032        | 0.0269         | -0.104         |
| q14 | -0.0089        | 0.0503         | -0.0834        | -0.0817 | 0.0096         | <b>0.5834*</b> | -0.0128        | 0.026          |
| q15 | <b>0.8957*</b> | 0.1865         | -0.0401        | 0.1303  | 0.1028         | -0.0503        | 0.0483         | 0.1623         |
| q16 | <b>0.9006*</b> | 0.1554         | -0.0277        | 0.0544  | 0.1133         | 0.0003         | -0.0523        | 0.1381         |
| q17 | 0.1578         | <b>0.8277*</b> | 0.1878         | 0.1234  | 0.007          | 0.0716         | 0.059          | 0.0823         |
| q18 | 0.1372         | <b>0.8271*</b> | 0.2158         | 0.1267  | 0.0194         | 0.0686         | 0.0428         | 0.0488         |
| q19 | 0.0796         | <b>0.4239*</b> | 0.1834         | 0.0881  | 0.0444         | -0.0735        | 0.0619         | 0.134          |
| q20 | 0.0628         | 0.028          | 0.0388         | 0.0941  | 0.008          | -0.1324        | 0.0911         | 0.1046         |
| q21 | 0.0583         | 0.077          | -0.0183        | 0.034   | 0.0457         | 0.022          | -0.0826        | <b>0.5197*</b> |
| q22 | -0.0031        | 0.0087         | 0.0383         | 0.0982  | -0.0507        | -0.014         | -0.0422        | 0.119          |
| q23 | 0.1949         | 0.0422         | -0.0955        | 0.0962  | -0.0034        | -0.0055        | -0.0262        | <b>0.579*</b>  |
| q24 | 0.1592         | 0.0753         | -0.0735        | -0.0522 | -0.2397        | 0.1131         | 0.0132         | 0.3256         |
| q25 | 0.1351         | 0.0289         | 0.0453         | 0.0588  | <b>0.6379*</b> | 0              | 0.0142         | -0.0059        |
| q26 | 0.0778         | 0.0245         | 0.0685         | -0.1297 | <b>0.6614*</b> | 0.0605         | 0.0009         | 0.0201         |
| q27 | -0.0466        | -0.179         | 0.0019         | -0.1204 | -0.0221        | 0.0698         | -0.0501        | 0.013          |
| q28 | -0.0177        | -0.0766        | 0.0333         | 0.0232  | 0.0046         | 0.004          | -0.4276        | 0.1494         |
| q29 | 0.0694         | -0.0134        | -0.0482        | 0.043   | 0.1769         | 0.0027         | 0.0055         | -0.0019        |
| q30 | -0.0449        | 0.0291         | -0.01          | -0.2916 | 0.056          | <b>0.6255*</b> | -0.1561        | 0.0409         |
| q31 | -0.0326        | -0.0053        | -0.0187        | -0.0562 | 0.0228         | 0.0596         | -0.065         | -0.0686        |

The bold values show the extracted components. Principal factor analysis used for extraction. Varimax with Kaiser Normalization used for Y Rotation method. The correlation (t-value > 1.96) between items and factors which was highly significant with values > 0.40 were categorized into Factors.

**Table 7 : Test-Retest Reliability using Intra-class correlation coefficient (ICC) for the individual items**

| Factors                                                             | Items | ICC<br>(95% confidence interval) | p-value |
|---------------------------------------------------------------------|-------|----------------------------------|---------|
| Satisfaction with doctor's care                                     | q12   | 0.80 (0.64 , 0.89)               | <0.001  |
|                                                                     | q15   | 0.83 (0.70 , 0.91)               | <0.001  |
|                                                                     | q16   | 0.85 (0.74 , 0.92)               | <0.001  |
| Satisfaction with the information given by the health care provider | q17   | 0.53 (0.17 , 0.74)               | 0.005   |
|                                                                     | q18   | 0.69 (0.45 , 0.83)               | <0.001  |
|                                                                     | q19   | 0.74 (0.54 , 0.85)               | <0.001  |
| Satisfaction with the health visitor                                | q8    | 0.71 (0.48 , 0.83)               | <0.001  |
|                                                                     | q9    | 0.54 (0.17 , 0.74)               | 0.005   |
|                                                                     | q10   | 0.70 (0.46 , 0.83)               | <0.001  |
|                                                                     | q13   | 0.20 (-0.42 , 0.55)              | 0.22    |
| Satisfaction with the TB services                                   | q1    | 0.82 (0.68 , 0.90)               | <0.001  |
|                                                                     | q2    | 0.63 (0.34 , 0.79)               | <0.001  |
|                                                                     | q3    | 0.66 (0.40 , 0.81)               | <0.001  |

**Table 8: Test-Retest Reliability using Intra-class correlation coefficient (ICC)**

| Factor                 | ICC<br>(95% confidence interval) | p-value |
|------------------------|----------------------------------|---------|
| Factor 1               | 0.83 (0.70, 0.91)                | <0.001  |
| Factor 2               | 0.68 (0.44, 0.82)                | <0.001  |
| Factor 3               | 0.63 (0.35, 0.79)                | <0.001  |
| Factor 4               | 0.74 (0.54, 0.86)                | <0.001  |
| Global (Overall) Score | 0.76 (0.57, 0.87)                | <0.001  |

### Supplementary References

1) Ishanuddin N.M. et al. (2021) Design and Implementation Content Validity Study: Development of an Instrument for Measuring Consumers' Perception of Automatic Emergency Braking (AEB). In: Stanton N. (Eds) Advances in Human Aspects of Transportation. AHFE 2021. Lecture Notes in Networks and Systems, vol 270. Springer, Cham. [https://doi.org/10.1007/978-3-030-80012-3\\_44](https://doi.org/10.1007/978-3-030-80012-3_44)
